# Supplementary material for: Dual-Drug Loaded Separable Microneedles for Efficient Rheumatoid Arthritis Therapy
Source: MDPI journal article supplement (doi:10.3390/pharmaceutics14071518), 2022-07-21
Supplement: s1 [file s1]

# Dual-drug loaded separable microneedles for efficient rheumatoid arthritis therapy

Mengchen An<sup>a,b,c</sup>, Mengxiao Shi <sup>a,b,c</sup>, Jingjing Su <sup>a,b,c</sup>, Yueru Wei <sup>a,b,c</sup>, Rongrong Luo<sup>a,b,c</sup>,  
Pengchao Sun<sup>a,b,c,\*</sup>, Yongxing Zhao<sup>a,b,c,\*</sup>

<sup>a</sup>Department of Pharmaceutics, School of Pharmaceutical Sciences, Zhengzhou University, No.100 Science Ave, Zhengzhou 450001, PR China

<sup>b</sup>Key Laboratory of Targeting Therapy and Diagnosis for Critical Diseases, Zhengzhou University, No.100 Science Ave, Zhengzhou 450001, PR China

<sup>c</sup>Key Laboratory of Advanced Pharmaceutical Technology, Ministry of Education of China, Zhengzhou University, Zhengzhou 450001, PR China

\*These are corresponding authors. Address: Department of Pharmaceutics, School of Pharmaceutical Sciences, Zhengzhou University, No.100 Kexue Ave, Zhengzhou 450001, PR China; Emails: pengchao\_sun@zzu.edu.cn, zhaoyx@zzu.edu.cn

## Supplementary materials

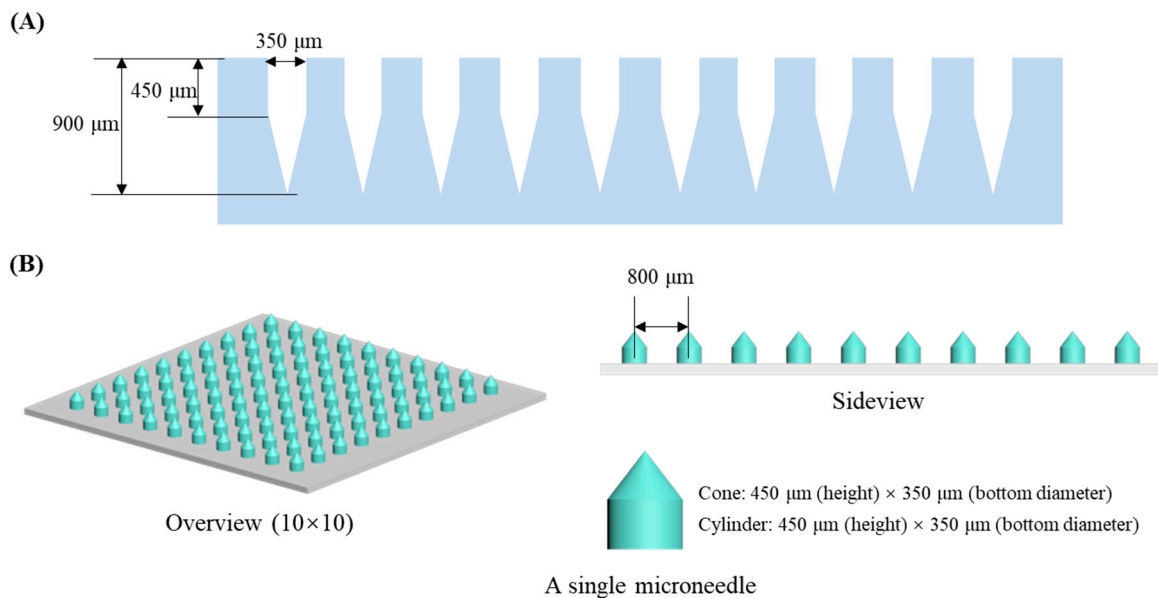

**Figure S1** Overview of the designed MN. (A) Side view of the PDMS mold. (B) Master mold.

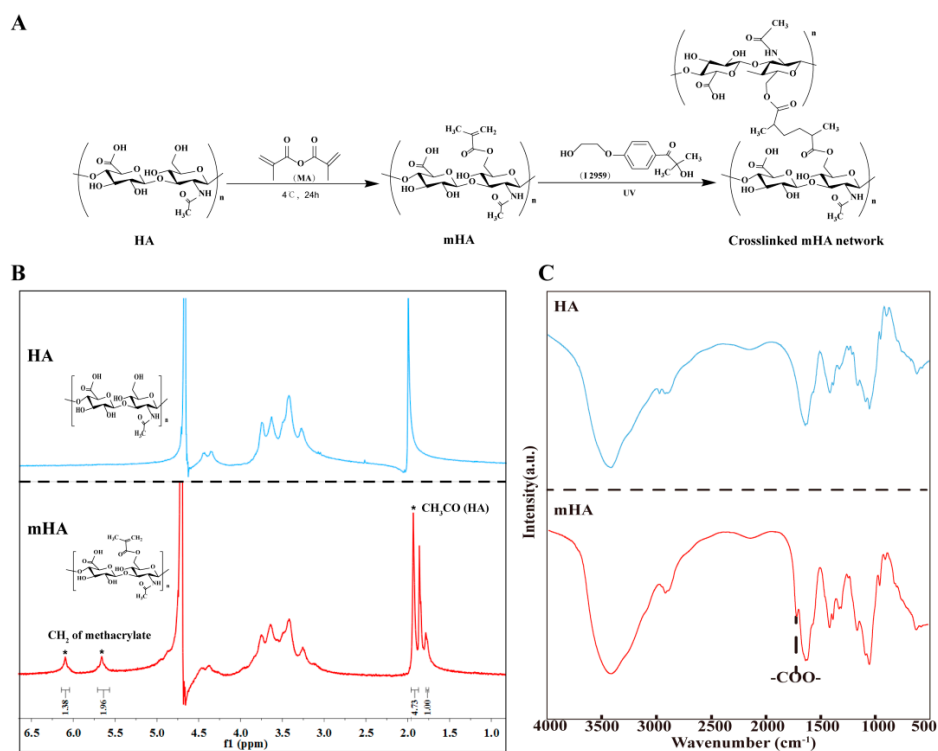

**Figure S2** Synthesis and characterization of methacrylate modified hyaluronic acid (mHA). (A) Synthesis of mHA and UV initiated crosslinking. (B) <sup>1</sup>H-NMR spectra of HA and mHA.

(C) FTIR spectra of HA and mHA.

HA gained carbon-carbon double bonds after esterification with methacrylate anhydride, which leads to the cross-linking of the network after UV irradiation. The characteristic peaks at  $\sim 6.1$  ppm and  $\sim 5.7$  ppm represented the methacrylate protons, while the peak at  $\sim 1.9$  ppm represented methyl proton signals of HA, indicating the successful preparation of mHA (Figure S2B). The successful synthesis of mHA was further verified by FTIR with a characteristic absorption at  $\sim 1700$   $\text{cm}^{-1}$  (Figure S2C).

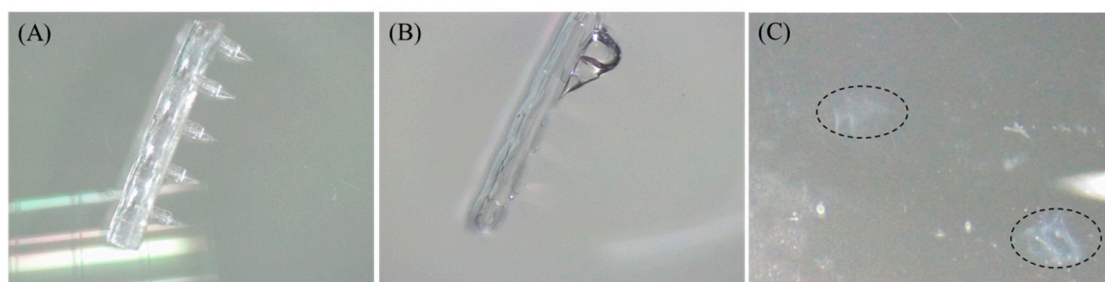

**Figure S3** The separation of MN. (A) Before water rinse. (B) Dissolution of the needle body. (C) Separated needle tips.

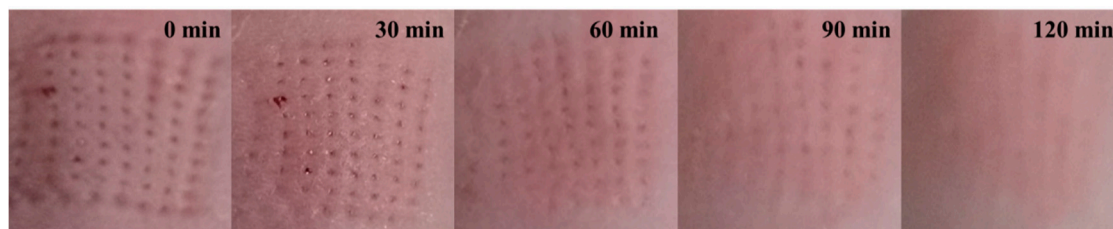

**Figure S4** Skin recovery after application of mHA prepared MN.

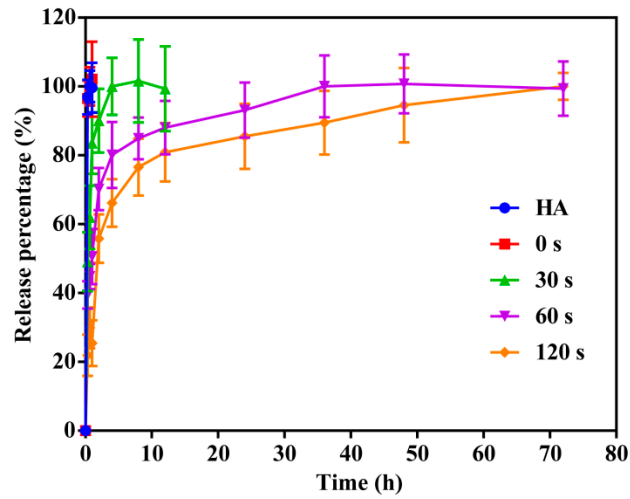

**Figure S5** *In vitro* release of BSA-FITC from the needle tips of the separable MN (0~80 h).

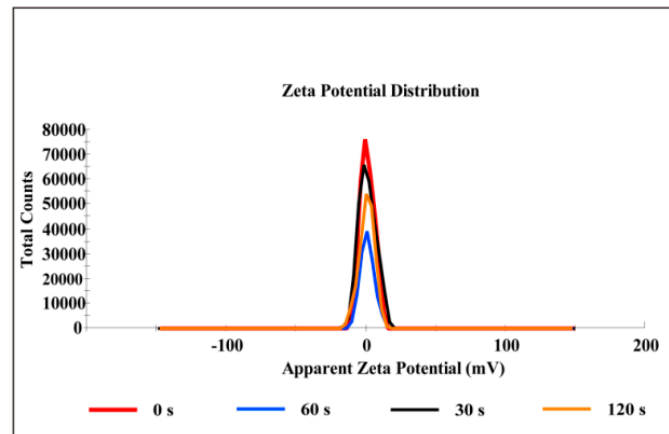

**Figure S6** Zeta potential of TCZ after UV irradiation.

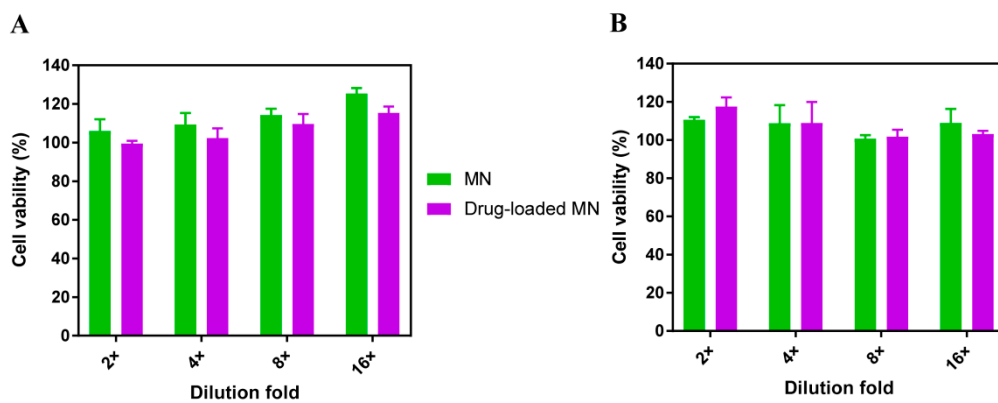

**Figure S7** The cytotoxicity of MN and drug-loaded MN against murine fibroblasts L929 (A) and human fibroblasts FLS (B).

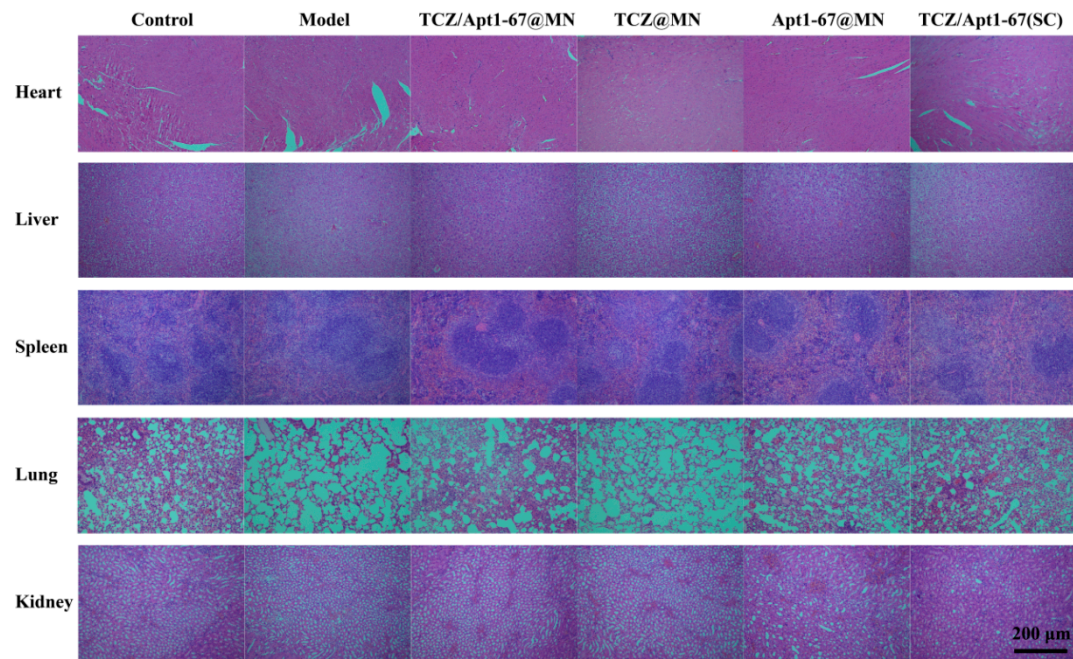

**Figure S8** Influences of various treatments on the organs of mice.

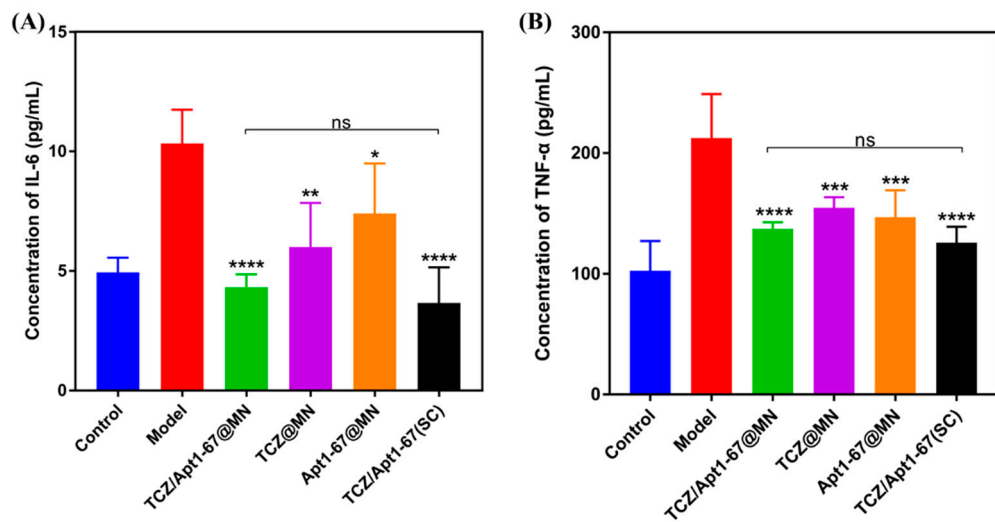

**Figure S9** Serum levels of IL6 (A) and TNF- $\alpha$  (B). \*p<0.05, \*\*p<0.01, \*\*\*p<0.001, \*\*\*\*p<0.0001, ns: not significant
